# Supplementary material for: Boosting the efficiency of deep-red Ir(iii) complexes by modulating nitrogen atoms for high-performance OLEDs
Source: Royal Society of Chemistry journal article supplement (doi:10.1039/d3qi01824e), 2023-11-02
Supplement: d3qi01824e1.pdf [file d3qi01824e1.pdf]

## Electronic Supplementary Information

### Boosting efficiency of deep-red Ir(III) complexes by modulating nitrogen atom for high-performance OLEDs

Li-Li Wen,<sup>a</sup> Jia-Ming Zhang,<sup>b</sup> Yi-Ping Han,<sup>a</sup> Ying-Chen Duan,<sup>\*a</sup> Wen-Fa Xie,<sup>\*b</sup> Kui-Zhan Shao,<sup>c</sup> Guo-Gang Shan,<sup>\*c</sup> Zhong-Min Su<sup>a</sup>

<sup>a</sup> School of Chemistry and Environmental Engineering, Changchun University of Science and Technology, Jilin Provincial International Joint Research Center of Photo functional Materials and Chemistry Changchun, Jilin 130022, P. R. China, E-mail: [duanyc122@nenu.edu.cn](mailto:duanyc122@nenu.edu.cn) (Y. C. Duan)

<sup>b</sup> State Key Laboratory of Integrated Optoelectronics, College of Electronic Science and Engineering, Jilin University, Changchun, Jilin 130012, P. R. China, E-mail: [xiewf@jlu.edu.cn](mailto:xiewf@jlu.edu.cn) (W. F. Xie)

<sup>c</sup> Institute of Functional Material Chemistry and National & Local United Engineering Lab for Power Battery, Faculty of Chemistry, Northeast Normal University, Changchun, 130024, P. R. China, E-mail: [shangg187@nenu.edu.cn](mailto:shangg187@nenu.edu.cn) (G. G. Shan)

#### List of Contents for Supplementary Information:

1. General Information
2. Structure characterization including NMR and MS spectra
3. DSC and TGA analysis
4. X-ray crystal structure analysis
5. Photophysical properties
6. OLED Device characterization

## General Information

### Physical Methods.

NMR experiments were recorded using a Bruker Avance 500 NMR spectrometer in  $\text{CDCl}_3$  and  $\text{DMSO}-d_6$  with the TMS as standard. Mass spectra (MS) was obtained with matrix-assisted laser desorption ionization time-of-flight (MALDI-TOF). TGA measurements were carried out on a TGA Q50 analyzer and DSC curves with DSC Q2000 differential scanning calorimeter. UV-vis absorption spectra were recorded in  $\text{CH}_2\text{Cl}_2$  solutions using a Cary 50 spectrophotometer. Steady-state emission properties were recorded using a FL-4600 spectrophotometer at room temperature. The cyclic voltammetry analysis was performed by a standard three-electrode method on a 620E electrochemical workstation at the scan rates from 100 mV/s. Platinum wire was used as a counter electrode; the reference electrode was a saturated calomel electrode, and the working electrode was a glassy carbon electrode. The experiments were carried out in degassed  $\text{CH}_2\text{Cl}_2$  and DMF solutions containing tetrabutylammonium perchlorate salt (0.1 M) as the electrolyte and the concentration of the complexes is ca.  $1 \times 10^{-3} \text{ mol L}^{-1}$ . The potentials are calculated vs the  $\text{Fc}^+/\text{Fc}$  couple. The single crystal structure was mounted on a Bruker Apex II CCD diffractometer with graphite-monochromated Cu  $K\alpha$  radiation ( $\lambda = 1.54178 \text{ \AA}$ ).

### Computations

To analyze the emission properties of **Ir(iqbt)<sub>2</sub>IPO** and **Ir(qabt)<sub>2</sub>IPO**, TD-DFT calculations were carried out using the Gaussian 16 C01 code. Theoretical calculation were performed utilizing the BL3YP functional, the SDD basis set and effective core potentials for Ir atom, and 6-31G\* basis set for all nonmetal atoms.

### Fabrication and Measurement of OLEDs

OLED devices were prepared on ITO-coated glass substrates ( $25 \text{ } \Omega \text{ sq}^{-1}$ ) by vacuum evaporation method. Prior to evaporation, the ITO substrates were deal with a regular procedure. All the organic layers and cathodes were successively deposited on the substrate by thermal evaporation at a base pressure of  $\sim 5 \times 10^{-4} \text{ Pa}$ . EL performance measurement of OLED were recorded by Ocean Optics Maya 2000-PRO spectrometer and a Keithley 2400 source meter.

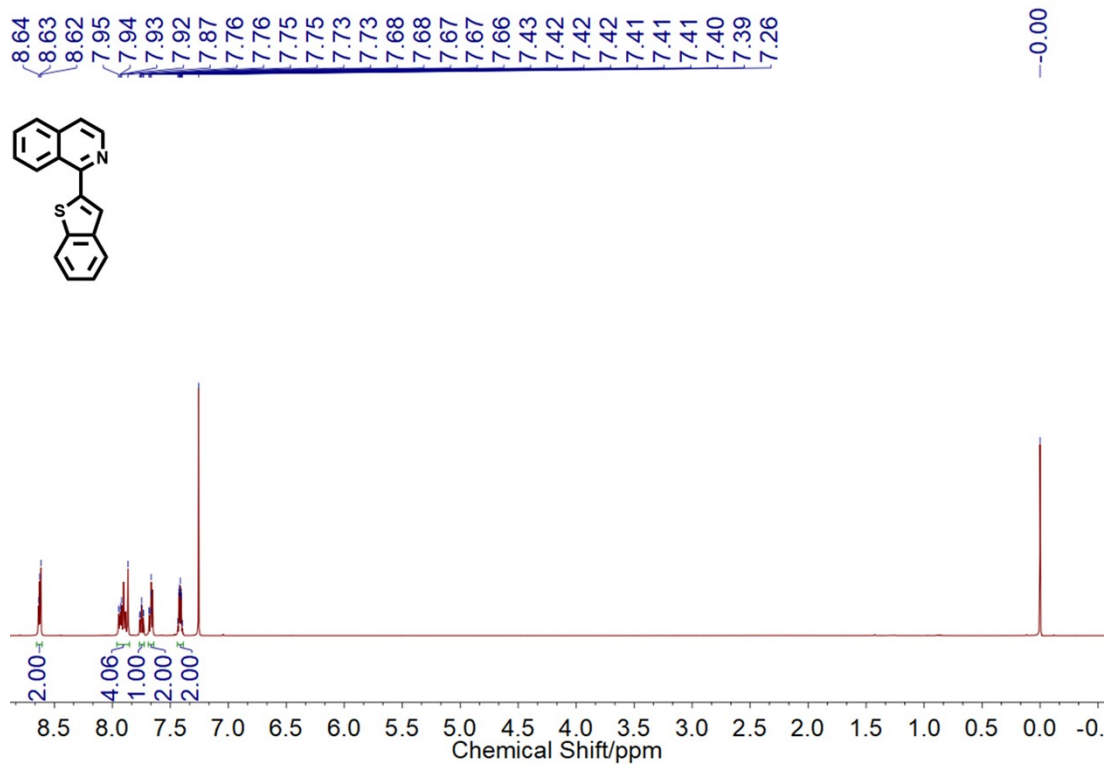

Figure S1. The  $^1\text{H}$  NMR spectrum of ligand iqbt.

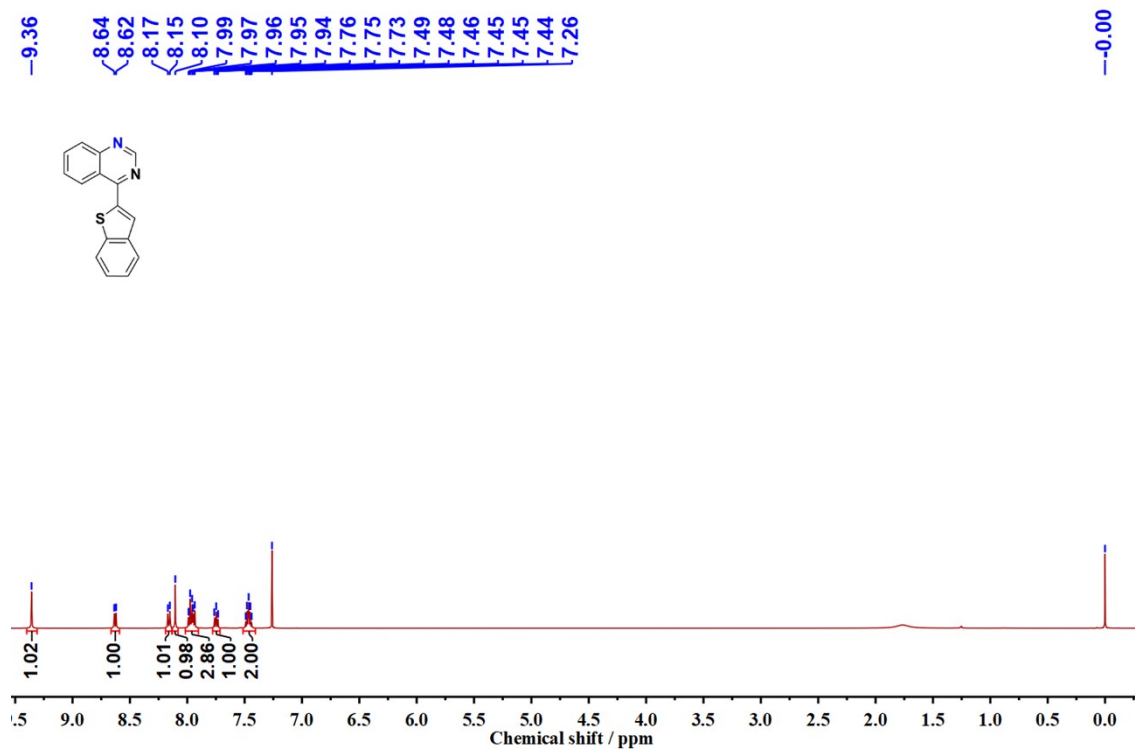

Figure S2. The  $^1\text{H}$  NMR spectrum of ligand qabt.

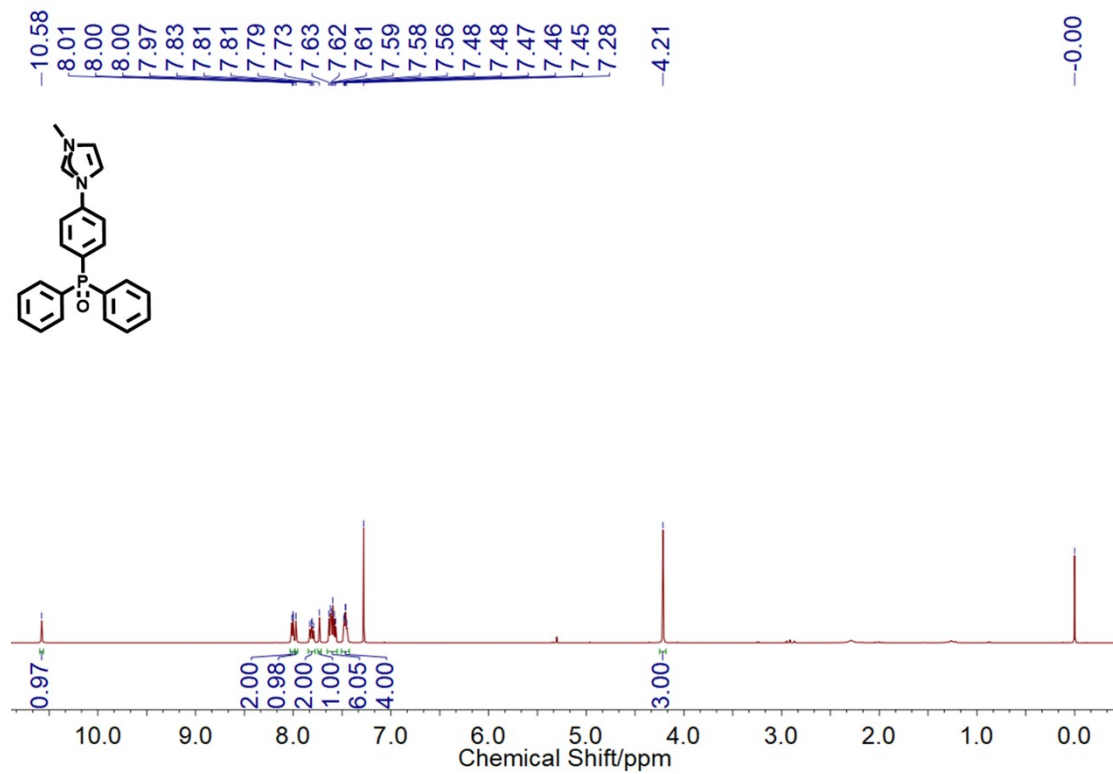

**Figure S3.** The <sup>1</sup>H NMR spectrum of ligand IPO.

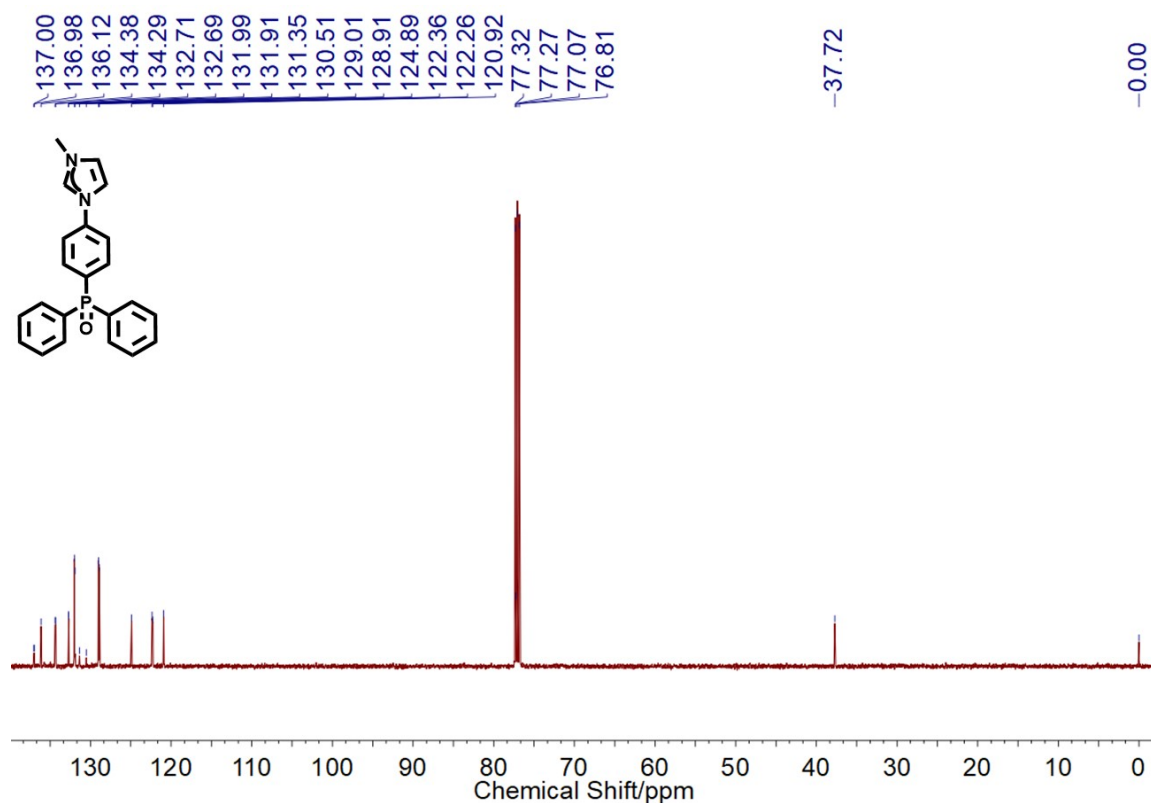

**Figure S4.** The <sup>13</sup>C NMR spectrum of ligand IPO.

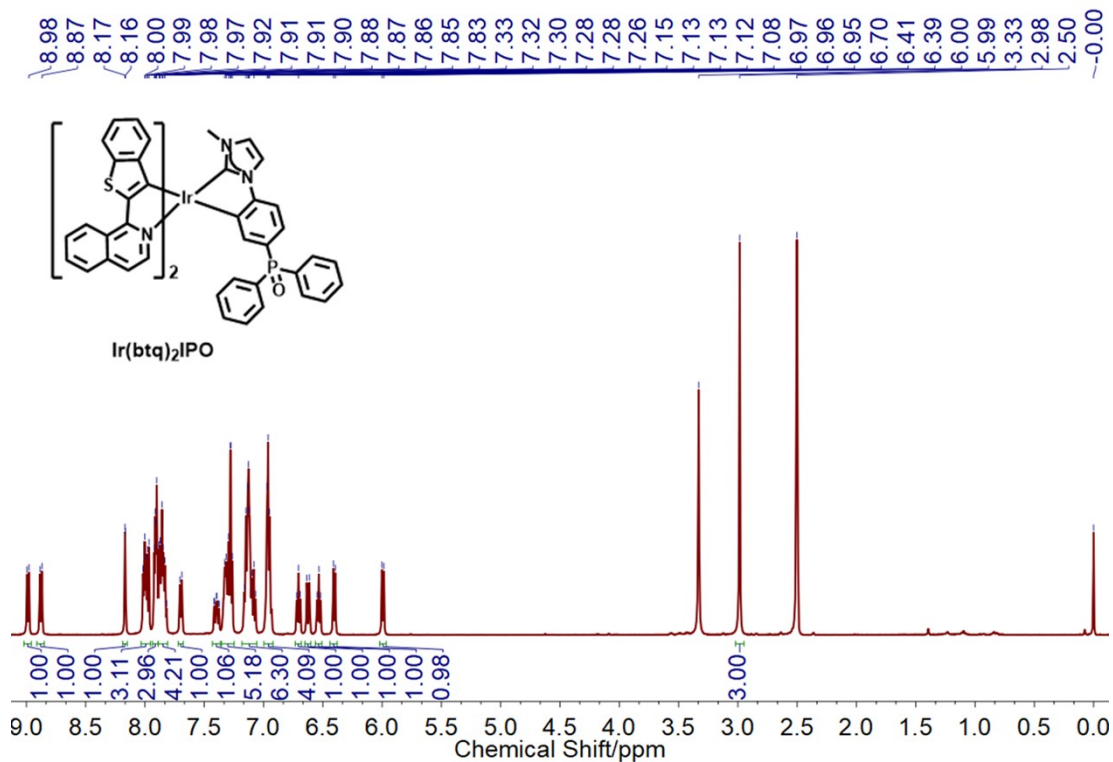

Figure S5. The  $^1\text{H}$  NMR spectrum of complex  $\text{Ir}(\text{iqbt})_2\text{IPO}$ .

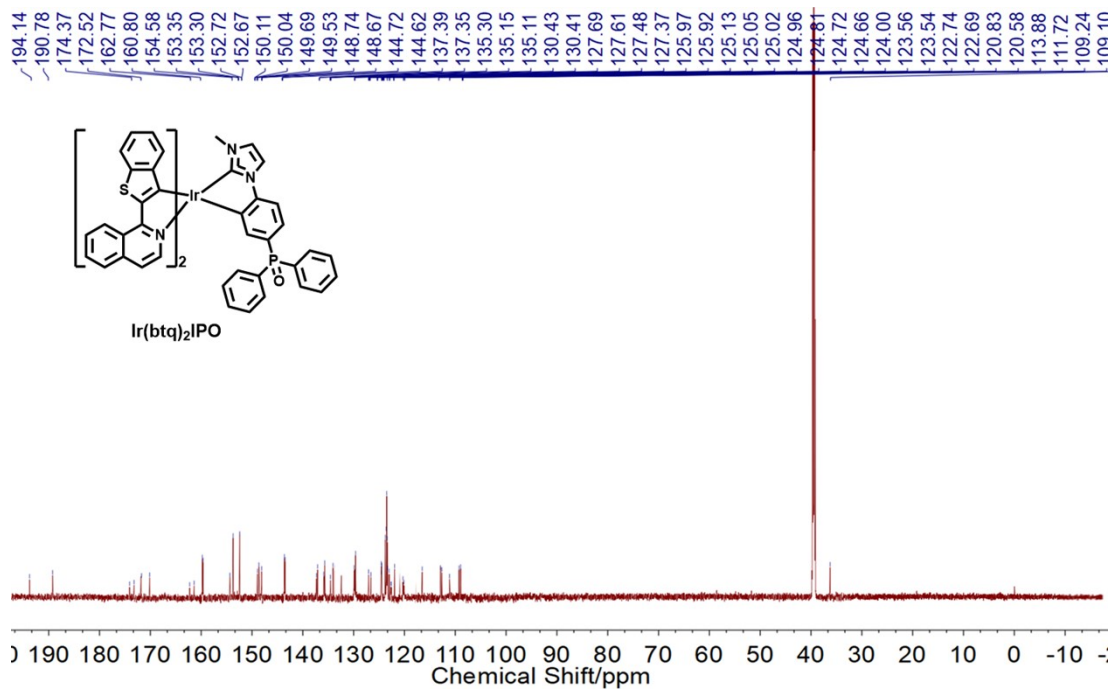

Figure S6. The  $^{13}\text{C}$  NMR spectrum of complex  $\text{Ir}(\text{iqbt})_2\text{IPO}$ .

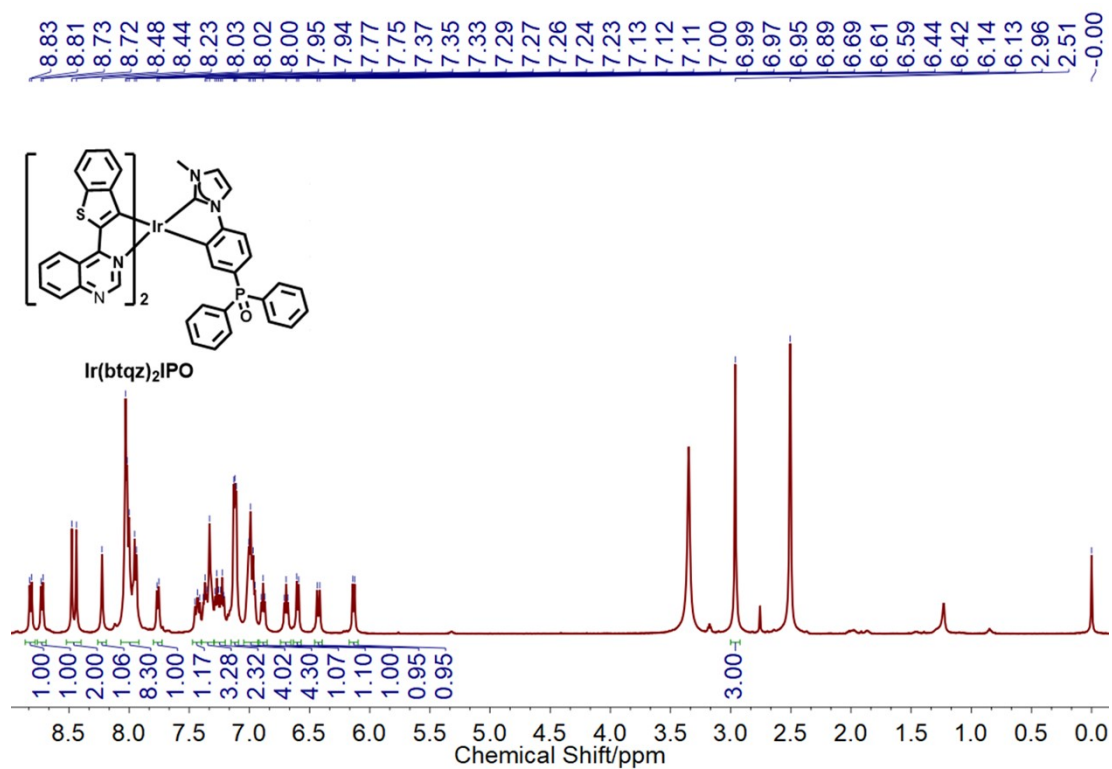

Figure S7. The  $^1\text{H}$  NMR spectrum of complex  $\text{Ir}(\text{qabt})_2\text{IPO}$ .

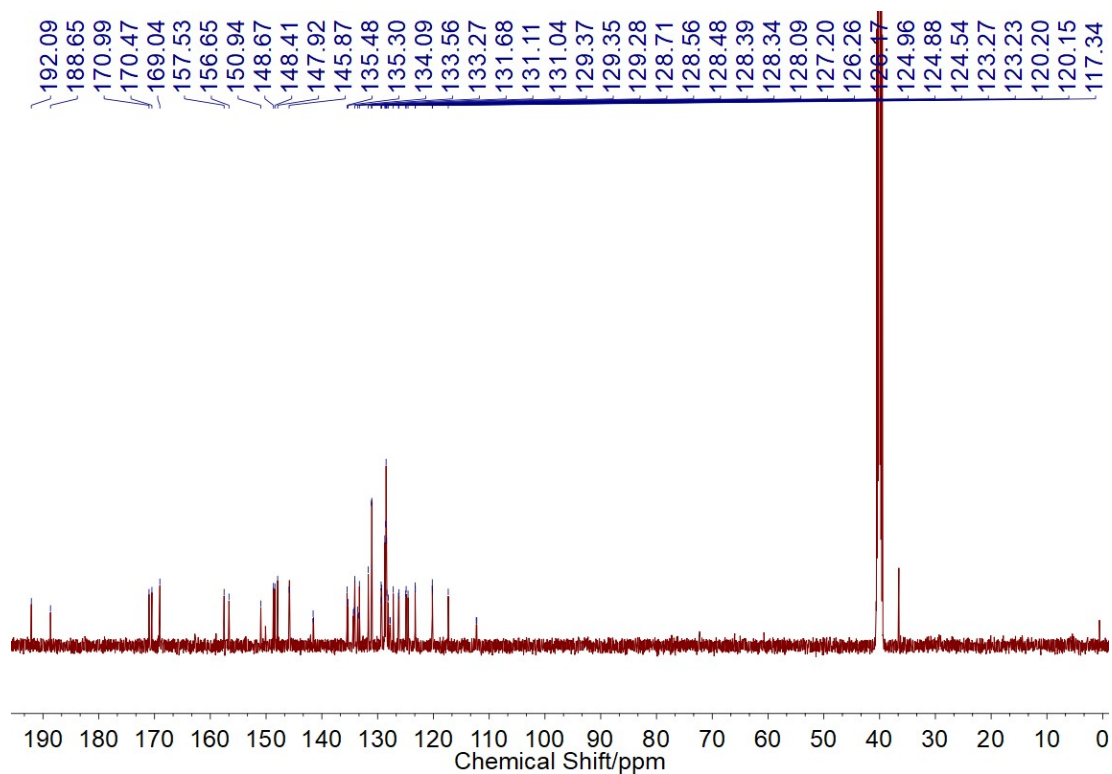

Figure S8. The  $^{13}\text{C}$  NMR spectrum of complex  $\text{Ir}(\text{qabt})_2\text{IPO}$ .

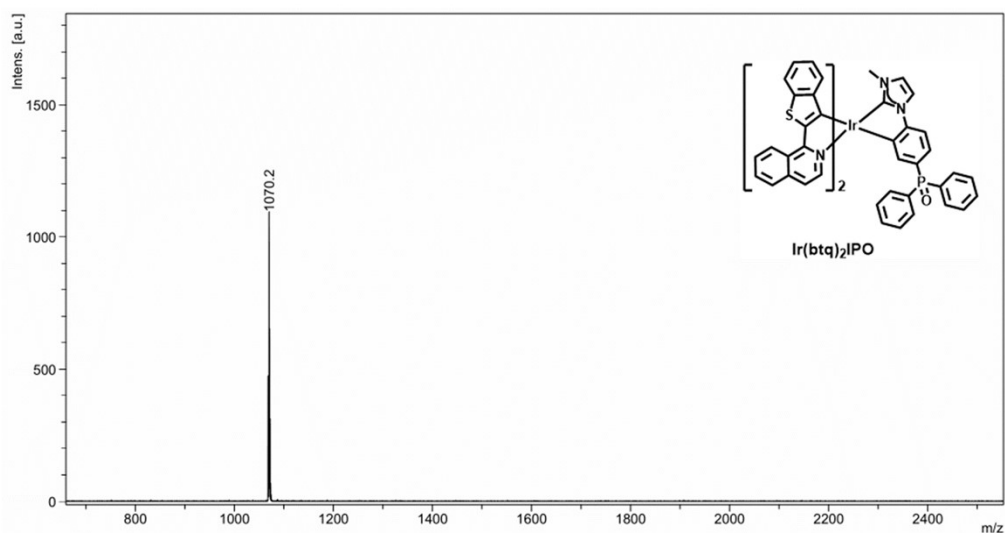

Figure S9. The MS of iridium(III)  $\text{Ir}(\text{iqbt})_2\text{IPO}$ .

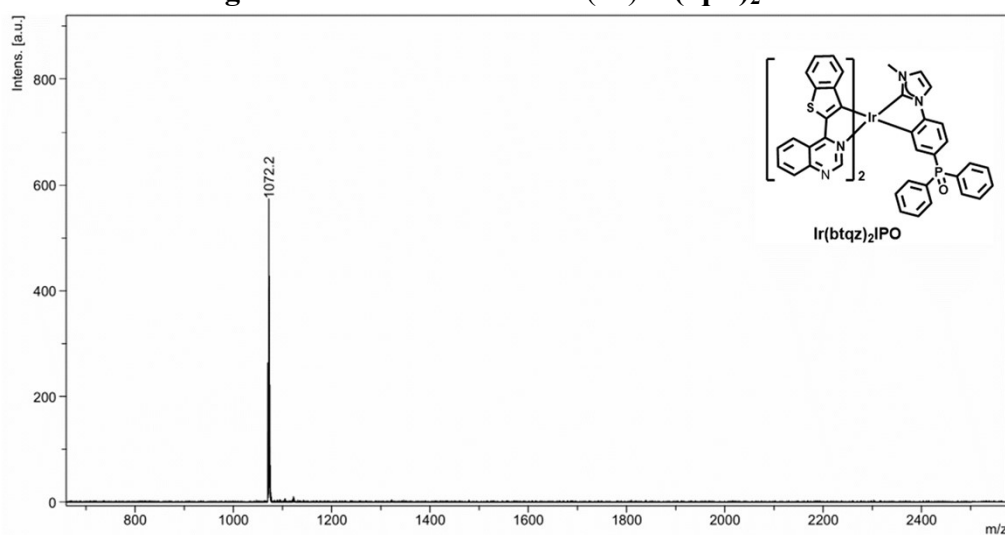

Figure S10. The MS of iridium(III)  $\text{Ir}(\text{qabt})_2\text{IPO}$

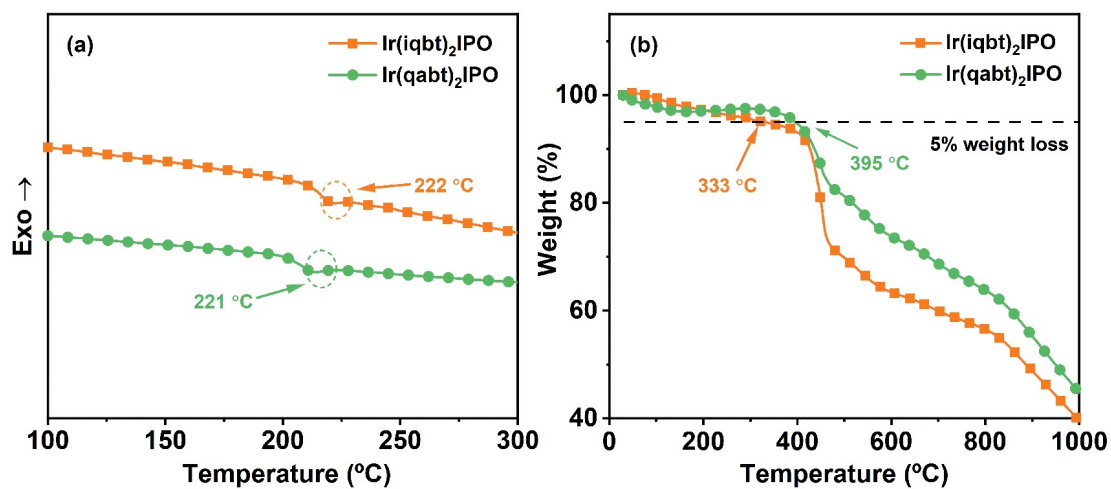

Figure S11. The DSC (a) and TGA (b) of designed Ir(III) complexes  $\text{Ir}(\text{iqbt})_2\text{IPO}$  and  $\text{Ir}(\text{qabt})_2\text{IPO}$ .

**Table S1.** The detailed crystallographic data of **Ir(iqbt)<sub>2</sub>IPO**.

| complex                                 | <b>Ir(iqbt)<sub>2</sub>IPO</b>                                         |
|-----------------------------------------|------------------------------------------------------------------------|
| Empirical formula                       | C <sub>56</sub> H <sub>38</sub> IrN <sub>4</sub> OPS <sub>2</sub>      |
| Formula weight                          | 1070.19                                                                |
| Temperature/K                           | 173.0                                                                  |
| Crystal system                          | monoclinic                                                             |
| Space group                             | <i>P</i> 2 <sub>1</sub> / <i>c</i>                                     |
| <i>a</i> /Å                             | 13.1339(3)                                                             |
| <i>b</i> /Å                             | 17.3611(4)                                                             |
| <i>c</i> /Å                             | 21.2247(5)                                                             |
| <i>α</i> /°                             | 90                                                                     |
| <i>β</i> /°                             | 98.0580(10)                                                            |
| <i>γ</i> /°                             | 90                                                                     |
| Volume/Å <sup>3</sup>                   | 4791.85(19)                                                            |
| <i>Z</i>                                | 4                                                                      |
| $\rho_{\text{calc}}/\text{cm}^3$        | 1.483                                                                  |
| $\mu/\text{mm}^{-1}$                    | 6.868                                                                  |
| F(000)                                  | 2136.0                                                                 |
| Radiation                               | CuK $\alpha$ ( $\lambda = 1.54178$ )                                   |
| 2 $\Theta$ range for data collection/°  | 6.604 to 127.508                                                       |
| Index ranges                            | -15 $\leq$ h $\leq$ 14, -20 $\leq$ k $\leq$ 20, -24 $\leq$ l $\leq$ 24 |
| Reflections collected                   | 45873                                                                  |
| Independent reflections                 | 7889 [ $R_{\text{int}} = 0.0559$ , $R_{\text{sigma}} = 0.0366$ ]       |
| Goodness-of-fit on F <sup>2</sup>       | 1.199                                                                  |
| Final R indexes [ $I \geq 2\sigma(I)$ ] | $R_1 = 0.0529$ , $wR_2 = 0.1174$                                       |
| Final R indexes [all data]              | $R_1 = 0.0514$ , $wR_2 = 0.1099$                                       |



**Table S2.** The selected bond lengths and angles of **Ir(iqbt)<sub>2</sub>IPO**.

| <b>Ir(iqbt)<sub>2</sub>IPO</b> |                 |
|--------------------------------|-----------------|
| Selected bonds                 | Bond length (Å) |
| Ir-C(1)                        | 2.054(6)        |
| Ir-C(18)                       | 2.076(6)        |
| Ir-C(35)                       | 2.058(7)        |
| Ir-C(40)                       | 2.086(6)        |
| Ir-N(1)                        | 2.059(5)        |
| Ir-N(2)                        | 2.072(5)        |
| Selected angles                | (°)             |
| C(1)-Ir-N(1)                   | 78.9(2)         |
| C(18)-Ir-N(2)                  | 77.9(2)         |
| C(35)-Ir-C(40)                 | 77.8(3)         |
| C(1)-Ir-C(35)                  | 165.7(2)        |
| C(18)-Ir-C(40)                 | 171.8(2)        |
| N(1)-Ir-N(2)                   | 177.4(2)        |

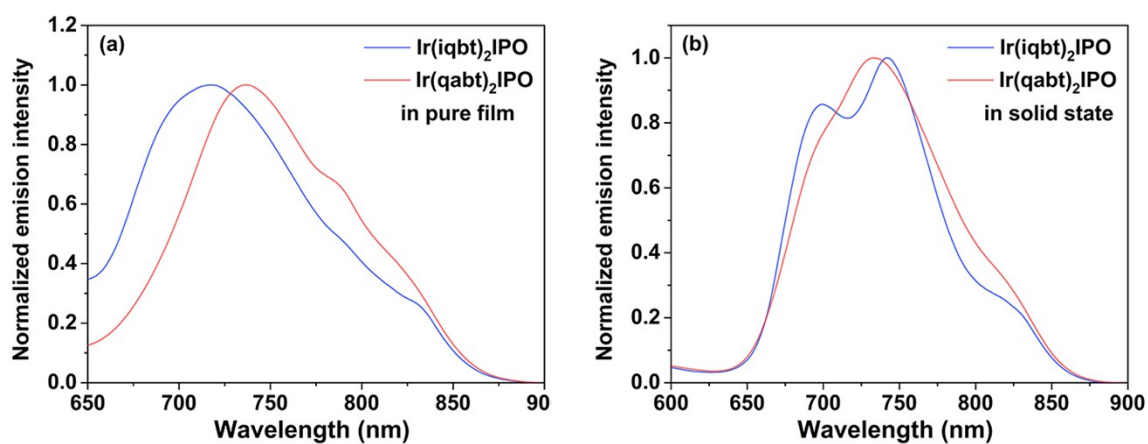

**Figure S12.** The PL spectra of **Ir(iqbt)<sub>2</sub>IPO** and **Ir(qabt)<sub>2</sub>IPO**: (a) measured at room temperature in their pure films ( $\lambda_{\text{ex}} = 460$  nm), (b) measured at room temperature in their solid state ( $\lambda_{\text{ex}} = 460$  nm).

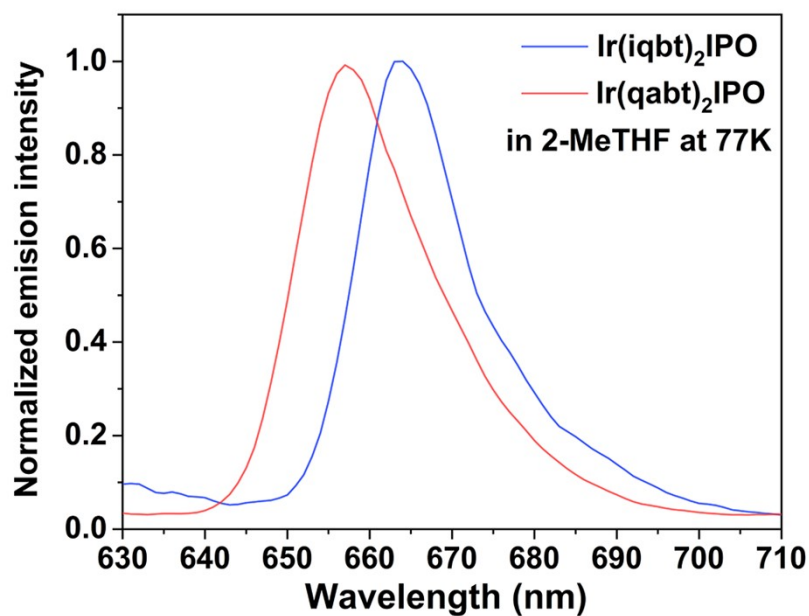

**Figure S13.** The PL spectra of complexes **Ir(iqbt)<sub>2</sub>IPO** and **Ir(qabt)<sub>2</sub>IPO** in degassed 2-methyltetrahydrofuran at 77 K ( $5 \times 10^{-5}$  M and  $\lambda_{\text{ex}} = 520$  nm).

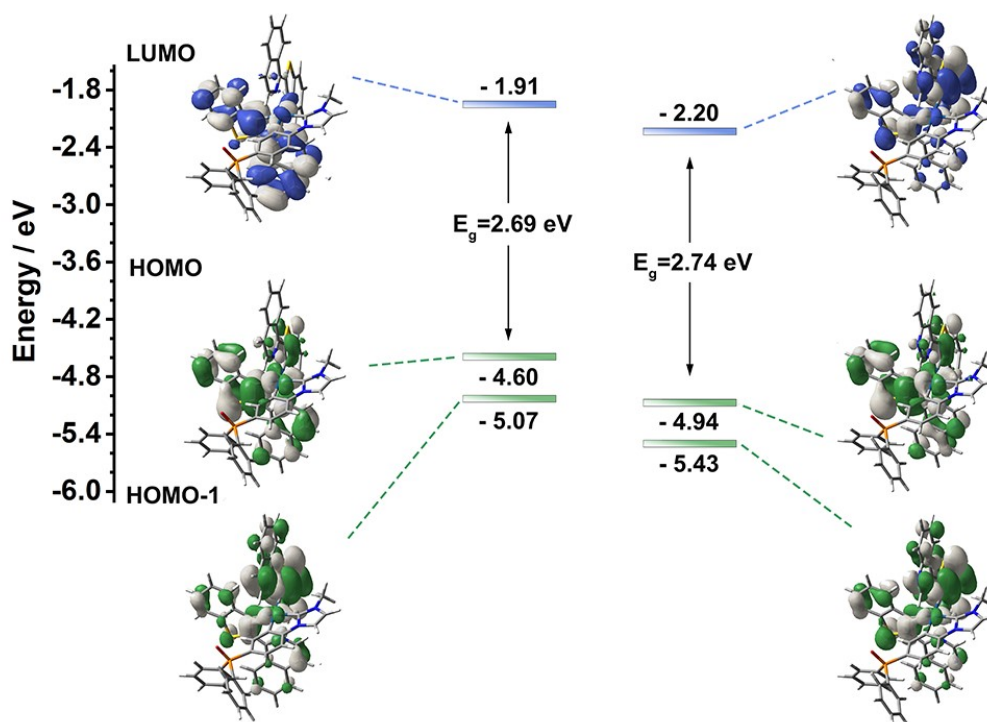

**Figure S14.** Theoretical contours and energy levels of the HOMO, HOMO-1, and LUMO for **Ir(iqbt)<sub>2</sub>IPO** and **Ir(qabt)<sub>2</sub>IPO** based on its optimized  $T_1$  geometry from different angles.

**Table S3** The Cartesian coordinates of the optimized triplet-state geometry of designed complexes studied in this work.

**Ir(iqbt)<sub>2</sub>IPO**

|    |               |              |               |
|----|---------------|--------------|---------------|
| Ir | 7.6739577018  | 6.4267161328 | 15.2293143945 |
| S  | 10.7460824038 | 3.1169953980 | 16.1786011104 |
| S  | 4.6180435084  | 5.5860294358 | 18.5052638106 |
| P  | 2.2318036824  | 7.9474570331 | 13.1793456030 |
| N  | 7.9694038801  | 4.8879305745 | 13.8205336171 |
| N  | 7.3982024595  | 7.8784634528 | 16.7075773542 |
| N  | 8.2160423141  | 8.4818029544 | 13.1528831347 |
| O  | 1.8003204995  | 6.7281057384 | 12.4071837648 |
| C  | 6.2393673237  | 7.5130387443 | 14.0696746582 |
| C  | 6.2432051967  | 5.5117585785 | 16.3812073395 |
| C  | 6.7880186192  | 8.4407812363 | 13.1571589773 |
| C  | 6.3620096762  | 7.6455484422 | 17.6432167585 |
| C  | 5.5840807996  | 4.2444090164 | 16.4349303351 |
| C  | 6.8280825639  | 9.8513237663 | 18.6829543177 |
| C  | 9.1479470038  | 5.2552655226 | 16.1574401977 |
| C  | 8.8942995308  | 7.6566263392 | 14.0118724215 |
| C  | 9.5695864190  | 4.1886552454 | 15.3699326123 |
| N  | 10.2064839049 | 7.9228999112 | 13.7650378084 |
| C  | 6.0244319347  | 8.6635998694 | 18.6263690884 |
| C  | 5.7184859994  | 3.1244352018 | 15.5770641366 |
| H  | 6.4054083129  | 3.1728121361 | 14.7429332983 |
| C  | 4.6419128439  | 9.1408228992 | 12.3477784270 |
| H  | 4.0409992647  | 9.7580594325 | 11.6880814218 |
| C  | 9.8084811823  | 5.2238516351 | 17.4467594511 |
| C  | 8.1083890473  | 9.0098939657 | 16.7821705203 |
| H  | 8.8981032816  | 9.1222403341 | 16.0502234074 |

|   |               |               |               |
|---|---------------|---------------|---------------|
| C | 9.6659365021  | 6.1159777709  | 18.5313050572 |
| H | 8.9799691932  | 6.9496542576  | 18.4468532188 |
| C | 5.8002829015  | 6.3660954292  | 17.4761405260 |
| C | 11.4371225785 | 3.9299960832  | 18.7778525897 |
| H | 12.1150236395 | 3.0865587692  | 18.8744845038 |
| C | 9.0863773118  | 9.2409734891  | 12.3870834671 |
| H | 8.7547739833  | 9.9503234296  | 11.6466228256 |
| C | 9.3123668808  | 3.0089869194  | 13.0687353590 |
| C | 1.6766993364  | 7.8922657014  | 14.9231866336 |
| C | 11.2732030602 | 4.8332098533  | 19.8234835626 |
| H | 11.8314723810 | 4.6922827381  | 20.7452451637 |
| C | 3.9166889319  | 2.9724967366  | 17.7438305398 |
| H | 3.2236407182  | 2.9130008627  | 18.5784645275 |
| C | 6.0316470210  | 9.2481791093  | 12.3095666466 |
| H | 6.4981480631  | 9.9506968547  | 11.6237526966 |
| C | 8.5039552617  | 2.9201588149  | 11.8897233563 |
| C | 10.4184862906 | 2.1250085480  | 13.1765420404 |
| H | 11.0938515469 | 2.1957854681  | 14.0180846668 |
| C | 10.7051227616 | 4.1315912929  | 17.6039283308 |
| C | 8.9728105268  | 4.0002466124  | 14.0678619971 |
| C | 4.6629697343  | 4.1132476929  | 17.5153859074 |
| C | 4.0337093882  | 8.2369617227  | 13.2294111525 |
| C | 1.4847822088  | 9.4681565516  | 12.4692674589 |
| C | 7.8873576726  | 9.9912794839  | 17.7370559471 |
| H | 8.5129031986  | 10.8782253730 | 17.7463394879 |
| C | 10.3901726536 | 5.9205324840  | 19.6998835481 |
| H | 10.2693761266 | 6.6109808991  | 20.5301362242 |
| C | 4.8389495248  | 7.4411629168  | 14.0705390834 |
| H | 4.3555095481  | 6.7366387411  | 14.7429779889 |
| C | 0.7323339303  | 9.3149949345  | 11.2969708974 |
| H | 0.6351911471  | 8.3224370334  | 10.8671702998 |
| C | 4.0750005076  | 1.8821507956  | 16.8680956519 |

|   |               |               |               |
|---|---------------|---------------|---------------|
| H | 3.4973991587  | 0.9764754244  | 17.0285027473 |
| C | 7.2270665690  | 4.8003886417  | 12.6783183297 |
| H | 6.4353786612  | 5.5316793086  | 12.5877738095 |
| C | 0.9949557144  | 11.8448229217 | 12.4521879008 |
| H | 1.0949634733  | 12.8278375564 | 12.9050856854 |
| C | 0.0907507607  | 6.9821862605  | 16.5175527598 |
| H | -0.7393837210 | 6.3172445975  | 16.7412330472 |
| C | 6.5593307000  | 10.8495087880 | 19.6384438290 |
| H | 7.1915890652  | 11.7339743022 | 19.6573140663 |
| C | 0.6030856614  | 7.0406914859  | 15.2208821587 |
| H | 0.1902289692  | 6.4202046709  | 14.4309776633 |
| C | 10.3394627336 | 8.8893911755  | 12.7717210535 |
| H | 11.3044708694 | 9.2332884439  | 12.4322655019 |
| C | 4.9715273349  | 1.9685581963  | 15.7980761807 |
| H | 5.0892020920  | 1.1224872110  | 15.1263612038 |
| C | 7.4379621893  | 3.8418838390  | 11.7277536408 |
| H | 6.7996012713  | 3.7976408099  | 10.8512354725 |
| C | 8.7908130996  | 1.9366972070  | 10.9094715301 |
| H | 8.1554920216  | 1.8817386733  | 10.0292640864 |
| C | 1.6092063898  | 10.7417535526 | 13.0449179695 |
| H | 2.1817612723  | 10.8762055326 | 13.9585938858 |
| C | 0.2488385263  | 11.6853270861 | 11.2806627922 |
| H | -0.2310729744 | 12.5458338249 | 10.8214870009 |
| C | 9.8562598715  | 1.0776994273  | 11.0628321187 |
| H | 10.0692100825 | 0.3282001274  | 10.3055413921 |
| C | 2.2393323443  | 8.6731077347  | 15.9439724427 |
| H | 3.0941465895  | 9.3111396362  | 15.7373331143 |
| C | 5.5046042052  | 10.7171840842 | 20.5384704600 |
| H | 5.3085159337  | 11.4925432962 | 21.2733554372 |
| C | 11.3441860026 | 7.3037737345  | 14.4366960522 |
| H | 11.9608036100 | 8.0731766871  | 14.9121165812 |
| H | 11.9522306672 | 6.7505441409  | 13.7142591044 |

|   |               |               |               |
|---|---------------|---------------|---------------|
| H | 10.9675354630 | 6.6163754805  | 15.1911455940 |
| C | 10.6829725576 | 1.1844232107  | 12.2016451046 |
| H | 11.5385852077 | 0.5246298998  | 12.3129520459 |
| C | 0.1176565512  | 10.4206815854 | 10.7048609127 |
| H | -0.4649334473 | 10.2932156294 | 9.7961471736  |
| C | 1.7255181009  | 8.6129065679  | 17.2404029253 |
| H | 2.1766548659  | 9.2122856177  | 18.0263917558 |
| C | 0.6484901333  | 7.7702500403  | 17.5266176919 |
| H | 0.2506458165  | 7.7218381239  | 18.5370872622 |
| C | 4.9501017044  | 8.5730986242  | 19.5347623084 |
| H | 4.2761387871  | 7.7282004821  | 19.5089704344 |
| C | 4.6995619324  | 9.5788594778  | 20.4739077304 |
| H | 3.8632692980  | 9.4633665169  | 21.1582607201 |

### **Ir(iqbt)<sub>2</sub>IPO**

|    |               |              |               |
|----|---------------|--------------|---------------|
| Ir | 7.6137410540  | 6.3758949540 | 15.2568852293 |
| S  | 10.8949697592 | 3.3808883282 | 16.3040094106 |
| S  | 4.5048494187  | 5.3077686330 | 18.3690457462 |
| P  | 2.2130624588  | 7.9917421751 | 13.1572843264 |
| N  | 8.0295615777  | 4.8540845115 | 13.8730758051 |
| N  | 7.1985077219  | 7.7999706295 | 16.7309716780 |
| N  | 8.2101897374  | 8.4188000855 | 13.1395683284 |
| O  | 1.7200028507  | 6.8148312814 | 12.3585846722 |
| C  | 6.2179894277  | 7.4565584142 | 14.0139655484 |
| C  | 6.1355703610  | 5.4313819327 | 16.2666214935 |
| C  | 6.7852658394  | 8.3762543084 | 13.1110734003 |
| C  | 6.2759304077  | 7.4342999605 | 17.6885781159 |
| C  | 5.3825057094  | 4.2027502391 | 16.1367587762 |
| C  | 6.6093762159  | 9.6522091299 | 18.6664390166 |
| C  | 9.1923723324  | 5.4297182945 | 16.1928772498 |
| C  | 8.8662027606  | 7.6374722612 | 14.0488622073 |

|   |               |              |               |
|---|---------------|--------------|---------------|
| C | 9.5959080999  | 4.2604025363 | 15.4968858761 |
| N | 10.1827588819 | 7.8947406752 | 13.8292636501 |
| C | 5.9809268287  | 8.3673568325 | 18.7462832354 |
| C | 5.4305341440  | 3.2184050650 | 15.1263130862 |
| H | 6.0964950735  | 3.3467115296 | 14.2841672101 |
| C | 4.6527829663  | 9.1044085912 | 12.2926618792 |
| H | 4.0628457126  | 9.7324022171 | 11.6333059093 |
| C | 9.9930295707  | 5.6187018083 | 17.3776922444 |
| C | 7.7097764756  | 9.0532813792 | 16.7552770488 |
| H | 8.4010621440  | 9.2871987237 | 15.9526138133 |
| C | 9.9519584760  | 6.6592183376 | 18.3337410382 |
| H | 9.2382487474  | 7.4648964399 | 18.2159961208 |
| C | 5.7210482451  | 6.1463686826 | 17.4265080117 |
| C | 11.8180165841 | 4.5708243367 | 18.6769817770 |
| H | 12.5338433987 | 3.7641094065 | 18.8083575831 |
| C | 9.0969426949  | 9.1478263090 | 12.3640401193 |
| H | 8.7830364378  | 9.8234938299 | 11.5858219380 |
| C | 9.2529910888  | 2.8231479176 | 13.3642251538 |
| C | 1.7007057624  | 7.8929296968 | 14.9132301106 |
| C | 11.7439637843 | 5.6145783917 | 19.6024811859 |
| H | 12.4092449054 | 5.6202516730 | 20.4611574445 |
| C | 3.6596481890  | 2.8583488356 | 17.2931832040 |
| H | 2.9765098611  | 2.7249036586 | 18.1271335692 |
| C | 6.0432908245  | 9.1890532981 | 12.2555762878 |
| H | 6.5235075376  | 9.8848215146 | 11.5730890787 |
| C | 8.6043295892  | 2.8533223485 | 12.0873256243 |
| C | 10.0948303875 | 1.7229883103 | 13.6551073172 |
| H | 10.5653978383 | 1.6320763545 | 14.6257758885 |
| C | 10.9556497302 | 4.5898259640 | 17.5846478618 |
| C | 8.9860612953  | 3.9271416691 | 14.2526972428 |
| C | 4.4700064361  | 3.9863664308 | 17.2053358620 |
| C | 4.0276976695  | 8.2171901375 | 13.1791720663 |

|   |               |               |               |
|---|---------------|---------------|---------------|
| C | 1.5141027106  | 9.5625623061  | 12.5134088792 |
| C | 10.8154610195 | 6.6511925802  | 19.4243476715 |
| H | 10.7660456058 | 7.4586931966  | 20.1497364785 |
| C | 4.8166825320  | 7.4052207358  | 14.0180301658 |
| H | 4.3194232751  | 6.7124777947  | 14.6903507611 |
| C | 0.7126518699  | 9.4732904851  | 11.3671761513 |
| H | 0.5545051054  | 8.4978013592  | 10.9169652964 |
| C | 3.7411374431  | 1.9038958057  | 16.2777011510 |
| H | 3.1141977833  | 1.0179451196  | 16.3214737984 |
| C | 7.4852427226  | 4.7729829358  | 12.6354012162 |
| H | 6.7621392445  | 5.5453423750  | 12.3960177525 |
| C | 1.1366372392  | 11.9587765992 | 12.5707641289 |
| H | 1.3001716077  | 12.9245323289 | 13.0417998494 |
| C | 0.1505970358  | 6.9383641736  | 16.5170011097 |
| H | -0.6795100568 | 6.2728327958  | 16.7388641696 |
| C | 6.3543519613  | 10.6257149893 | 19.6552199439 |
| H | 6.8499516783  | 11.5856024841 | 19.5509029712 |
| C | 0.6283609319  | 7.0394730815  | 15.2096069122 |
| H | 0.1895625718  | 6.4509439003  | 14.4093585337 |
| C | 10.3388636589 | 8.8159435436  | 12.7986753832 |
| H | 11.3119915068 | 9.1486408524  | 12.4725285778 |
| C | 4.6206852572  | 2.0901657827  | 15.2016644946 |
| H | 4.6690359902  | 1.3464049834  | 14.4115665000 |
| C | 8.8449761010  | 1.8263216457  | 11.1512735749 |
| H | 8.3360080445  | 1.8935806878  | 10.1950488060 |
| C | 1.7202534815  | 10.8142079082 | 13.1134256383 |
| H | 2.3339244020  | 10.9002399606 | 14.0060044714 |
| C | 0.3406478367  | 11.8630140605 | 11.4253775751 |
| H | -0.1147052571 | 12.7559939263 | 11.0049546571 |
| C | 9.6905057352  | 0.7738696048  | 11.4588342813 |
| H | 9.8681751573  | -0.0147079305 | 10.7328962989 |
| C | 2.2957719854  | 8.6340401645  | 15.9456856010 |



|   |               |               |               |
|---|---------------|---------------|---------------|
| H | 3.1470312136  | 9.2767745182  | 15.7385674923 |
| C | 5.5057794112  | 10.3508070273 | 20.7130160722 |
| H | 5.3147217873  | 11.1048763715 | 21.4713746434 |
| C | 11.3085634480 | 7.2884786308  | 14.5395235529 |
| H | 12.2177565506 | 7.8233031126  | 14.2575348428 |
| H | 11.4081696042 | 6.2348889241  | 14.2703727496 |
| H | 11.1602374186 | 7.3679187242  | 15.6160614958 |
| C | 10.3090937339 | 0.7216594035  | 12.7202070951 |
| H | 10.9578632399 | -0.1125222404 | 12.9723575427 |
| C | 0.1291337413  | 10.6207926467 | 10.8252626578 |
| H | -0.4912849980 | 10.5432848231 | 9.9362661300  |
| C | 1.8184630723  | 8.5291819374  | 17.2530826066 |
| H | 2.2940523196  | 9.0959969305  | 18.0489314900 |
| C | 0.7430705801  | 7.6837726709  | 17.5383404375 |
| H | 0.3732541979  | 7.6013511371  | 18.5571407578 |
| C | 5.1272046602  | 8.1144900478  | 19.8478255215 |
| H | 4.6540469112  | 7.1486569177  | 19.9673103127 |
| C | 4.8954320900  | 9.0867438753  | 20.8079379670 |
| H | 4.2388216972  | 8.8634903330  | 21.6441459411 |
| N | 7.7329039048  | 3.8576419015  | 11.7323894224 |
| N | 7.4673922226  | 9.9824340318  | 17.6437390253 |

**Table S4.** Calculated transition wavelength and molecular orbital analysis in the triplet state for **Ir(iqbt)<sub>2</sub>IPO** and **Ir(qabt)<sub>2</sub>IPO** calculated by TDDFT approach.

|                                | $\lambda_{Expt}$ |     | $E^c$ | Configuration <sup>d</sup>                                   | Nature | <sup>3</sup> MLCT(%) |
|--------------------------------|------------------|-----|-------|--------------------------------------------------------------|--------|----------------------|
|                                | $\lambda^a$      | $b$ |       |                                                              |        |                      |
| <b>Ir(iqbt)<sub>2</sub>IPO</b> | 71               | 682 | 1.7   | (83% <sup>3</sup> MLCT/ <sup>3</sup> LC/ <sup>3</sup> LLC    |        | 13.72                |
|                                | 2                |     | 4     | H→L ) T                                                      |        |                      |
|                                |                  |     |       | H- (8%) <sup>3</sup> MLCT/ <sup>3</sup> LLCT/ <sup>3</sup> L |        |                      |
| <b>Ir(qabt)<sub>2</sub>IP</b>  | 67               | 680 | 1.8   | (81% <sup>3</sup> MLCT/ <sup>3</sup> LC/ <sup>3</sup> LLC    |        | 16.45                |
|                                | O                | 4   | 4     | H→L ) T                                                      |        |                      |

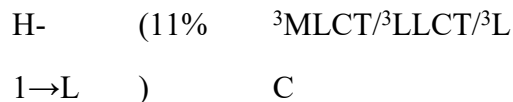

<sup>a</sup> Calculated emission wavelengths. <sup>b</sup> Measured emission wavelengths. <sup>c</sup> Excitation energy. <sup>d</sup> H, H-1 and L denote HOMO, HOMO-1 and LUMO, respectively; data in parentheses are the contributions of corresponding excitations.

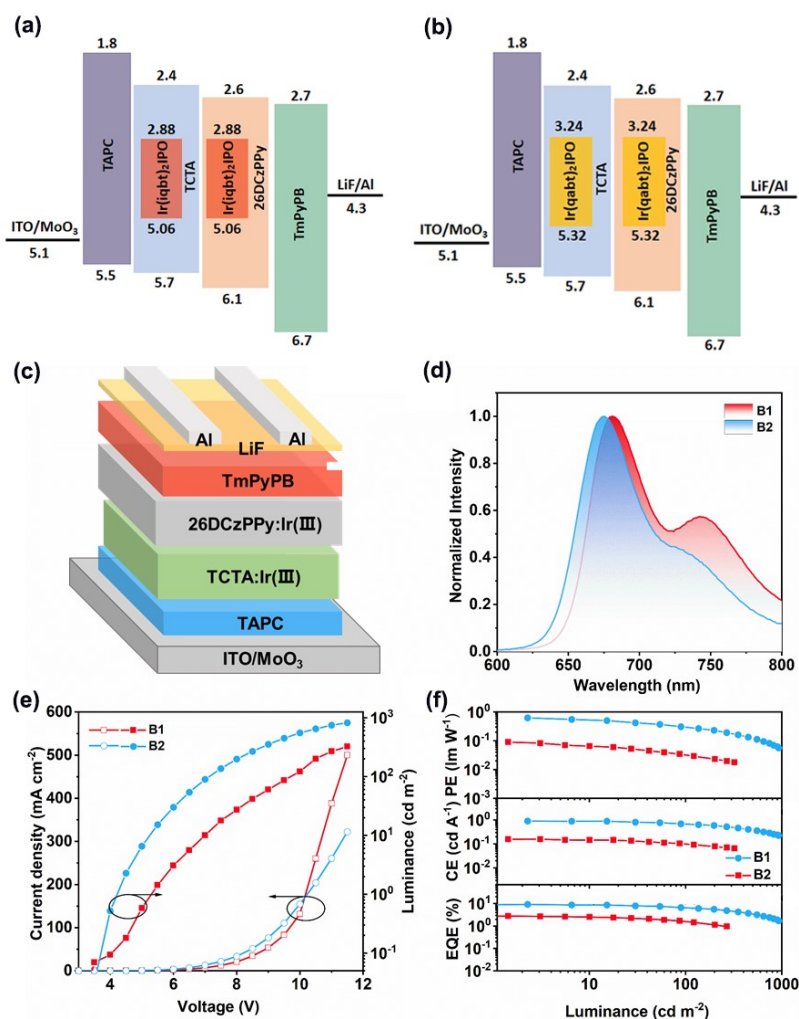

**Figure S15.** (a) The energy levels diagram of devices B1. (b) The energy levels diagram of devices B2. (c) Device structure of B1 and B2. (d) EL spectra of both devices B1 and B2. (e) J–V–L characteristics. (f) CE, PE, EQE vs luminance.
